# Supplementary material
Source: publisher figshare collection journal article supplement (https://karger.figshare.com/ndownloader/files/14161874)
Supplement: Supplementary file 1 [file 14161874]

**Supplementary online data**

The rTNSS consists of four nasal symptoms: congestion, itching, rhinorrhoea and sneezing. Each nasal symptom was scored from 0 to 3 by patients twice daily (AM + PM) on each treatment day:

0 = none (no symptoms present)

1 = mild (mild symptoms that are noticeable and do not interfere with any activity)

2 = moderate (symptoms that are slightly bothersome and slightly interfere with activity or night time sleep)

3 = severe (symptoms that are bothersome and interfere with activity or nighttime sleep). Therefore, the maximum score for rTNSS was 24 (i.e. four symptoms x score of 3 x 2 [for AM + PM]).

The rTOSS consists of three ocular symptoms: itching, redness and watering. Each ocular symptom was scored from 0 to 3 by patients twice daily (AM + PM) on each treatment day. For the symptoms of itchy eyes and watery eyes, the scale was the same as that used for nasal symptoms. For the symptom of red eyes the following scale was used:

0 = none (no redness present)

1 = mild (slightly dilated blood vessels and pinkish color compared with subject’s normal color)

2 = moderate (more dilation of blood vessels and red color compared with subject’s normal color)

3 = severe (large, numerous dilated blood vessels and deep red color compared with subject’s normal color)

The maximum score for rTOSS was 18 (i.e. three symptoms x score of 3 x 2 [for AM + PM]).
